# Supplementary material for: Unraveling the transcriptional regulation of TWIST1 in limb development
Source: PLoS Genet. 2018 Oct 29;14(10):e1007738. doi: 10.1371/journal.pgen.1007738 (PMC6233932; doi:10.1371/journal.pgen.1007738)
Supplement: S2 Table — (XLSX) [file pgen.1007738.s002.xlsx]

## Sheet: S2 Table 
S2 Table: Summary of enhancer assay in zebrafish
In vivo enahncer candidiates
		Positive GFP embryos at 72 hpf
Enhancer	Injected embryos	Pectoral fin		Branchial arch		Caudal fin		Brain		Heart		Somitic muscles		Otic vesicle
eTw_1	104	19	0.182692	6	0.0576923	65	0.625	22	0.211538	26	0.25	25	0.240385	-	-
eTw_2	171	5	0.0292398	50	0.292398	5	0.0292398	-	-	-	-	-	-	-	-
eTw_3	102	0	0	0	0	3	0.0294118	4	0.0392157	0	0	6	0.0588235	-	-
eTw_4	113	14	0.123894	8	0.0707965	12	0.106195	5	0.0442478	28	0.247788	33	0.292035	-	-
eTw_5	137	46	0.335766	53	0.386861	72	0.525547	25	0.182482	48	0.350365	96	0.70073	-	-
eTw_6	152	32	0.210526	119	0.782895	13	0.0855263	-	-	-	-	-	-	-	-
eTw_7	229	8	0.0349345	0	0	0	0	-	-	-	-	-	-	-	-
eTw_8	149	45	0.302013	87	0.583893	5	0.033557	41	0.275168	28	0.187919	27	0.181208	-	-
eTw_9	93	25	0.268817	-	-	51	0.548387	-	-	-	-	-	-	-	-
eTw_10	92	-	-	-	-	-	-	-	-	-	-	-	-	-	-
eTw_11	126	49	0.388889	38	0.301587	8	0.0634921	19	0.150794	15	0.119048	21	0.166667	62	0.492063
eTw_12	128	0	0	0	0	0	0	0	0	0	0	0	0	-	-
Segmental enhancer analysis
		Positive GFP embryos at 72 hpf
Enhancer	Injected embryos	Pectoral fin		Branchial arch		Caudal fin		Brain		Heart		Somitic muscles
eTw-2 seg_1	134	1	0.00746269	12	0.0895522	4	0.0298507	10	0.0746269	8	0.0597015	10	0.0746269
eTw-2 seg_2	134	2	0.0149254	13	0.0970149	7	0.0522388	8	0.0597015	9	0.0671642	21	0.156716
eTw-5 seg_1	109	9	0.0825688	5	0.0458716	0	0	1	0.00917431	21	0.192661	15	0.137615
eTw-5 seg_2	99	46	0.464646	48	0.484848	55	0.555556	17	0.171717	11	0.111111	16	0.161616
eTw-5 seg_3	111	17	0.153153	38	0.342342	8	0.0720721	33	0.297297	56	0.504505	104	0.936937
eTw-5 seg_1+seg_2	147	71	0.482993	72	0.489796	89	0.605442	30	0.204082	44	0.29932	19	0.129252
eTw-5 seg_2+seg_3	145	35	0.241379	41	0.282759	57	0.393103	27	0.186207	6	0.0413793	52	0.358621
eTw-6 seg_1	114	0	0	1	0.00877193	0	0	4	0.0350877	9	0.0789474	7	0.0614035
eTw-6 seg_2	109	22	0.201835	25	0.229358	21	0.192661	94	0.862385	18	0.165138	33	0.302752
eTw-6 seg_3	100	10	0.1	20	0.2	22	0.22	60	0.6	2	0.02	22	0.22
eTw-6 seg_4	70	0	0	10	0.142857	0	0	16	0.228571	3	0.0428571	10	0.142857
eTw-11 seg_1	96	0	0	2	0.0208333	0	0	5	0.0520833	7	0.0729167	3	0.03125
eTw-11 seg_2	187	75	0.40107	68	0.363636	1	0.00534759	22	0.117647	51	0.272727	13	0.0695187
eTw-11 seg_3	151	17	0.112583	12	0.0794702	4	0.0264901	30	0.198675	39	0.258278	36	0.238411
eTw-11 seg_4	114	2	0.0175439	0	0	0	0	13	0.114035	6	0.0526316	4	0.0350877
TFBS mutated enhancer analysis
		Positive GFP embryos at 72 hpf
Enhancer	Injected embryos	Pectoral fin		Branchial arch		Caudal fin		Brain		Heart		Somitic muscles
eTw_5	137	46	0.335766	53	0.386861	72	0.525547	25	0.182482	48	0.350365	96	0.70073
eTw-5 seg_2	99	46	0.464646	48	0.484848	55	0.555556	17	0.171717	11	0.111111	16	0.161616
eTw-5 seg_2 ΔLMX1B	99	9	0.0909091	17	0.171717	17	0.171717	0	0
eTw-5 seg_2 ΔTFAP2	87	40	0.45977	68	0.781609	71	0.816092	8	0.091954
eTw_6	152	32	0.210526	119	0.782895	13	0.0855263	-	-	-	-	-	-
eTw-6 ΔLMX1B	145	0	0	40	0.275862	0	0	1	0.00689655
eTw-6 ΔTFAP2	53	10	0.188679	48	0.90566	0	0	8	0.150943
